# Supplementary material for: Anti-inflammatory action of β-hydroxybutyrate via modulation of PGC-1α and FoxO1, mimicking calorie restriction
Source: PubMed Central journal article supplement (PMC6402511; doi:10.18632/aging.101838), 2019-02-27
Supplement: aging-11-101838-s001.pdf [file aging-11-101838-s001.pdf]

SUPPLEMENTARY FIGURES

(A)

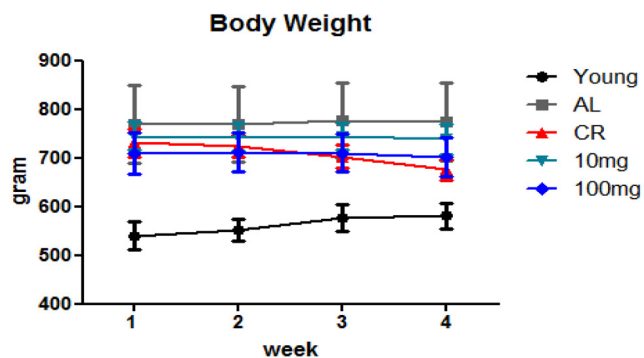

(B)

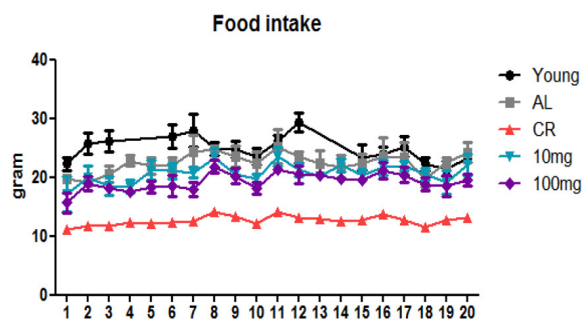

**Figure S1. Change of body weight in  $\beta$ -hydroxybutyrate (HB)-treated aged rat.** HB were stratified by body weight and randomly assigned to five groups ( $n = 4$ ). (A) Body weight and (B) food intake were measured after 30 days of HB treatment. Aged rats were administered 10 or 100 mg of HB.

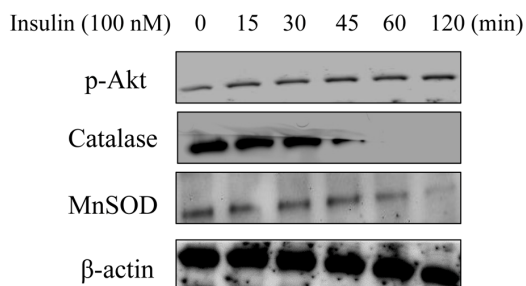

**Figure S2. Insulin regulates inflammation in kidney cells.** Cytosolic proteins were subjected to western blot analysis for p-Akt, catalase, and MnSOD. HEK293T cell were incubated with or without 100 nM insulin. Three independent experiments were performed, and similar results were obtained.

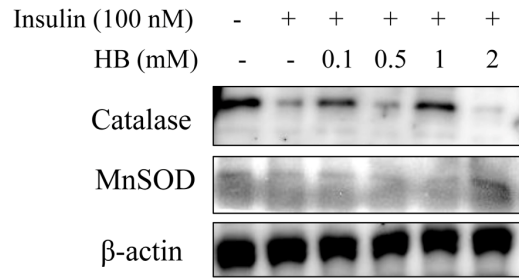

**Figure S3. Changes in the levels of anti-inflammatory genes.** Cytosolic catalase and MnSOD levels were decreased by pretreatment with 0.1-2 mM  $\beta$ -hydroxybutyrate (HB) for 3 h, followed by incubation with or without 100 nM insulin 100 nM for 6 h.

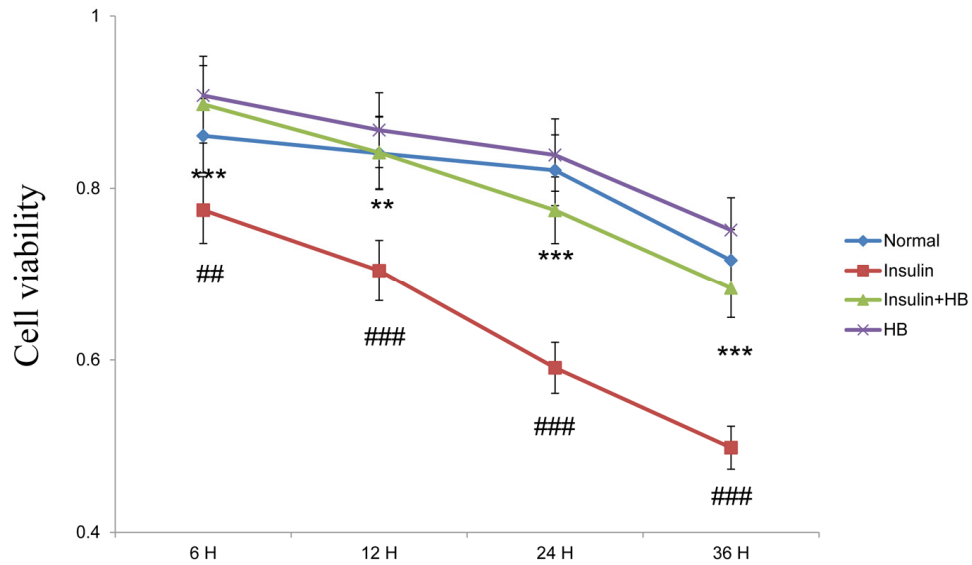

**Figure S4. Effects of  $\beta$ -hydroxybutyrate (HB) in HEK293T cells.** Cell viability was measured in cells treated with 0.5 mM of HB or 100 nM of insulin. #  $p < 0.05$ , ###  $p < 0.001$ , vs. non-treated normal; \*  $p < 0.05$ , \*\*\*  $p < 0.001$  vs. insulin treatment.

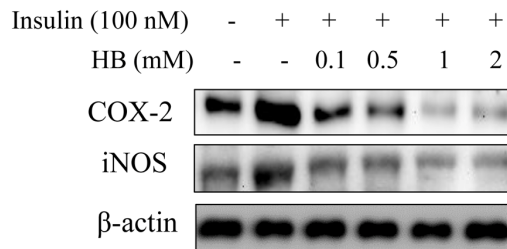

**Figure S5.  $\beta$ -hydroxybutyrate (HB) regulates the insulin-induced expression of inflammatory genes.** Cytosolic COX-2 and iNOS levels noticeably decreased by pretreatment with 0.1-2 mM HB for 3 h, followed by incubation with or without 100 nM insulin for 6 h.

(A)

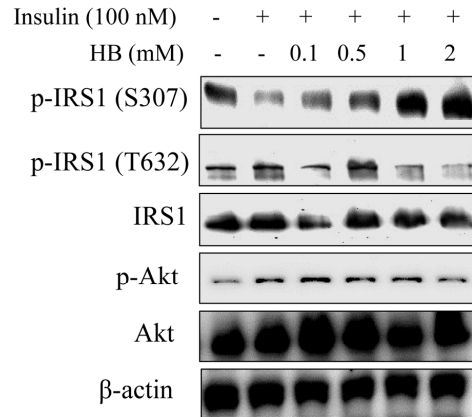

(B)

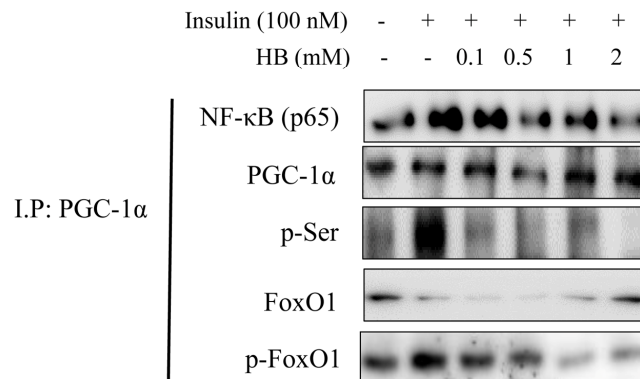

**Figure S6. Interaction of PGC-1 $\alpha$  between FoxO1 and NF- $\kappa$ B in cells.** (A) Western blotting was performed to examine the protein levels of p-IRS-1 (Ser307), p-IRS-1 (Tyr632), IRS, p-Akt, and Akt with 0.1–2 mM HB for 3 h, followed by incubation with or without 100 nM insulin for 6 h. (B) Western blotting showed that immunoprecipitated PGC-1 $\alpha$  were physically associated with p-Serine, PGC-1 $\alpha$ , p-FoxO1, FoxO1, and NF- $\kappa$ B, respectively.

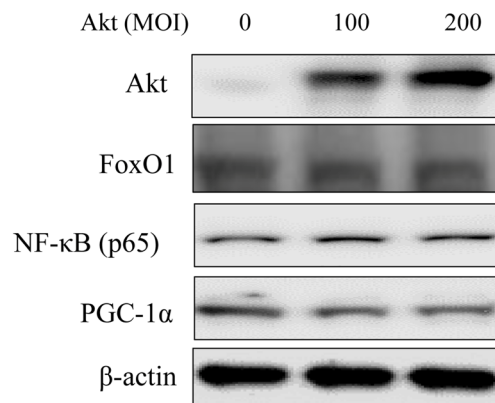

**Figure S7. Akt suppressed FoxO1 activity in HEK293T cells.** HEK293T cells were pre-transduced with a vector containing Akt (100 and 200 MOI). Protein levels were analyzed by western blotting.

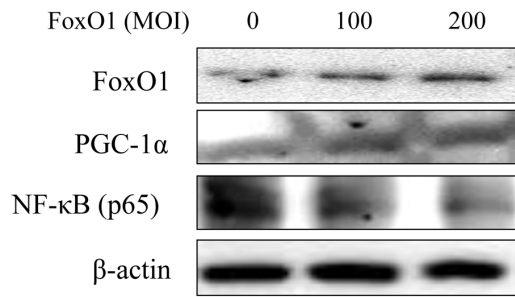

**Figure S8. FoxO1 induced inflammation in HEK293T cells.** HEK293T cells were pre-transduced with a vector containing FoxO1 (100 and 200 MOI). Protein levels were analyzed by western blotting.

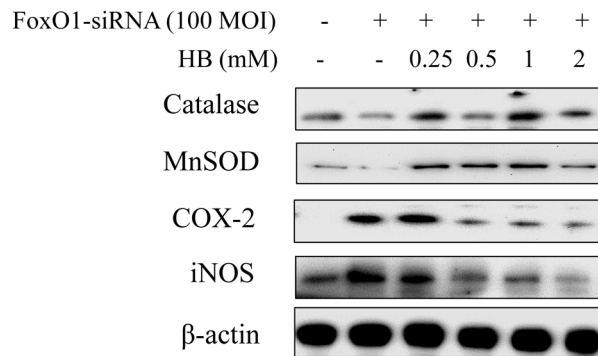

**Figure S9. Effect of  $\beta$ -hydroxybutyrate (HB) on the expressions of FoxO1 and NF- $\kappa$ B after FoxO1 knockdown.** Western blot analysis was used to assess protein levels in FoxO1 siRNA-treated HEK293T cells. Catalase, MnSOD, COX-2, and iNOS protein levels in cells pretreated for 3 h with HB in the absence or presence of FoxO1 siRNA-transfected cells (200 MOI) for 1 day.
